# Supplementary material for: Miocene Antarctic ice sheet area responds significantly faster than volume to CO 2 -induced climate change
Source: Copernicus journal article supplement (doi:10.5194/cp-2023-12), 2023-05-08
Supplement: Supplementary file 1 [file cp-2023-12-supplement.pdf]

## SUPPLEMENTARY MATERIAL

### *Miocene Antarctic ice sheet area responds significantly faster than volume to CO<sub>2</sub>-induced climate changes*

by L.B. Stap, C.J. Berends, and R.S.W. van de Wal

#### A) Volume

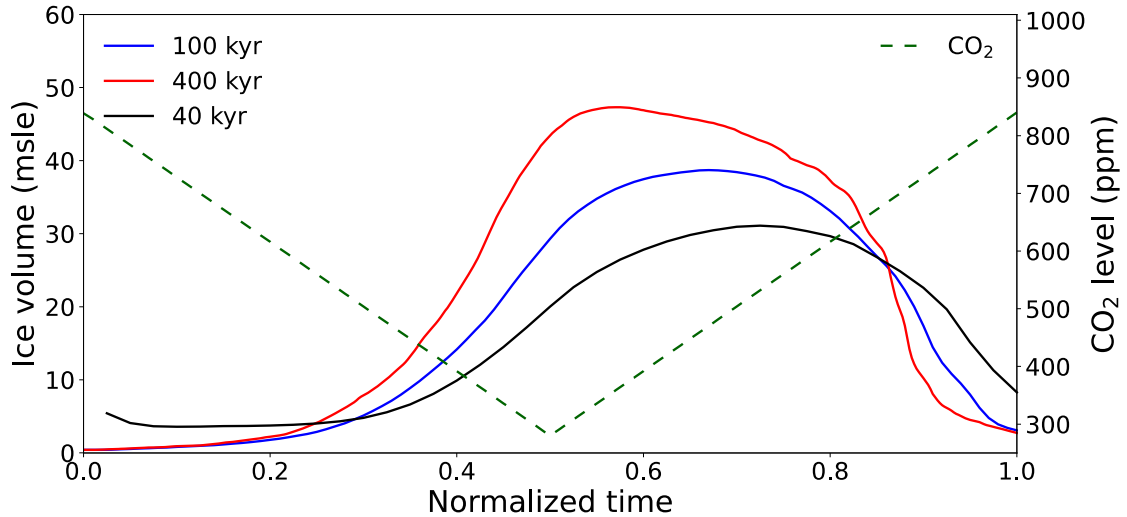

#### B) Area

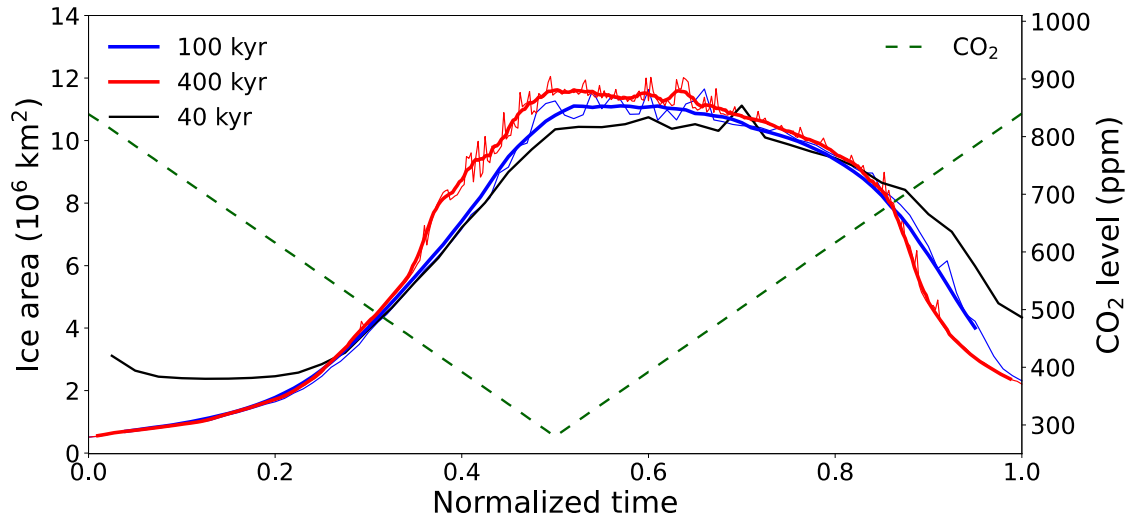

**Figure S1. (A)** Transient evolution of the forcing CO<sub>2</sub> level (green dashed) and the resulting ice volume over time, normalized with respect to the maximum integration time, for the 100-kyr (blue), 400-kyr (red) simulations, and the final cycle of the 40-kyr simulation (black).

**(B)** Same for CO<sub>2</sub> and ice area. For the 100-kyr and 400-kyr simulations, we show the 10-kyr moving average (thick lines) in addition to the 1-kyr output (thin lines).

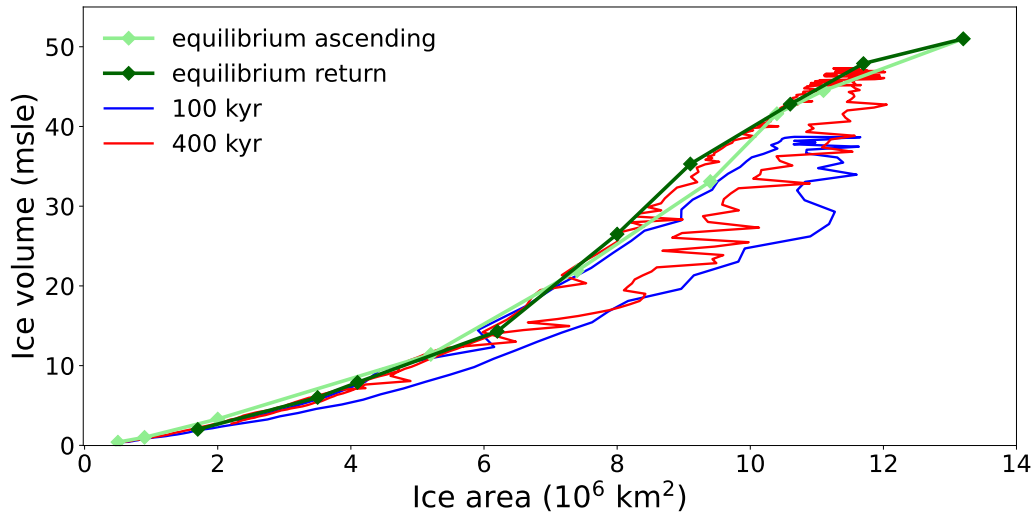

**Figure S2.** Ice volume plotted against ice area, for the 100-kyr (blue) and 400-kyr (red) simulations. The progression direction is counterclockwise. The connected symbols indicate the ascending branch (lightgreen) and return branch (darkgreen) equilibrium ice volume and area.

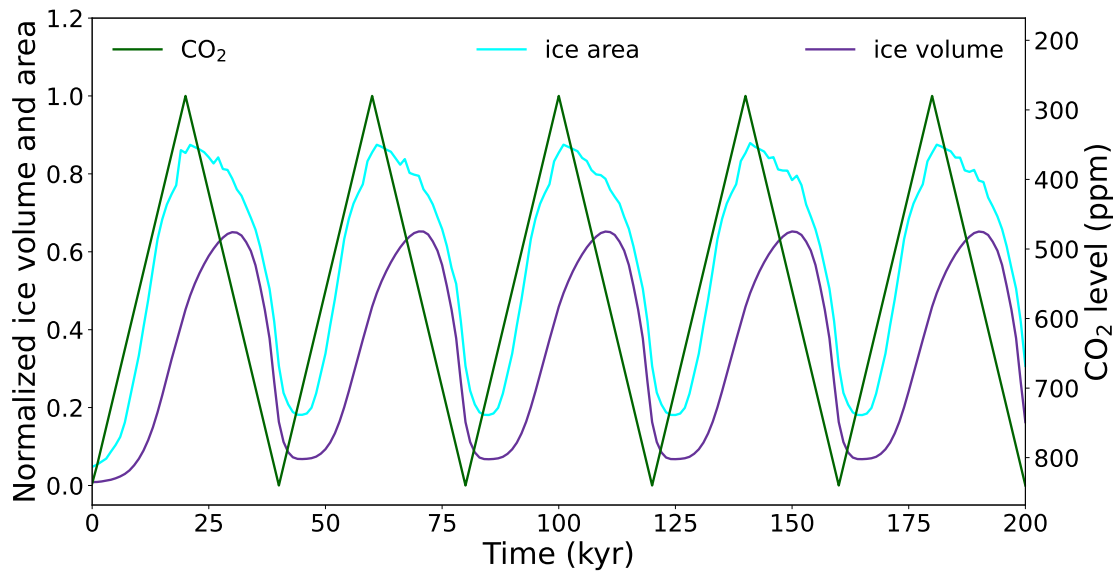

**Figure S3.** Results for the 40-kyr simulation using an index method in which the interpolation of the climate forcing is solely based on the CO<sub>2</sub> level (NOFEEDB experiment in Stap et al., 2022). Transient evolution over time of ice area (cyan) and ice volume (purple) relative to their maximum sizes as obtained from the 280-ppm equilibrium simulation,  $14.4 \times 10^6 \text{ km}^2$  and 60.1 msle respectively. The green line shows the forcing CO<sub>2</sub> level. The right y-axis is reversed because CO<sub>2</sub> is generally negatively related to the benthic  $\delta^{18}\text{O}$  signal.

## Section S1

We perform an additional experiment using a model set-up representative for Pleistocene glacial-interglacial variability of the North American ice sheet, that is described in detail in Scherrenberg et al. (2023). Briefly, we deploy the updated version 2.0 of IMAU-ICE. This version uses the DIVA approach - which is slightly different from the hybrid SIA/SSA approach - to calculate the dynamics of grounded and floating ice (Berends et al., 2022). The grid covers the North American continent on a 40x40-km resolution. We carry out an equilibrium and a transient simulation like those for the Miocene Antarctic ice sheet. An equilibrium simulation is conducted at a CO<sub>2</sub> level of 190 ppm. In the transient simulation, the CO<sub>2</sub> level is linearly decreased from 280 to 190 ppm, and then increased back to 190 ppm. In Fig. S4, we show the forcing CO<sub>2</sub> level and the resulting ice area and volume.

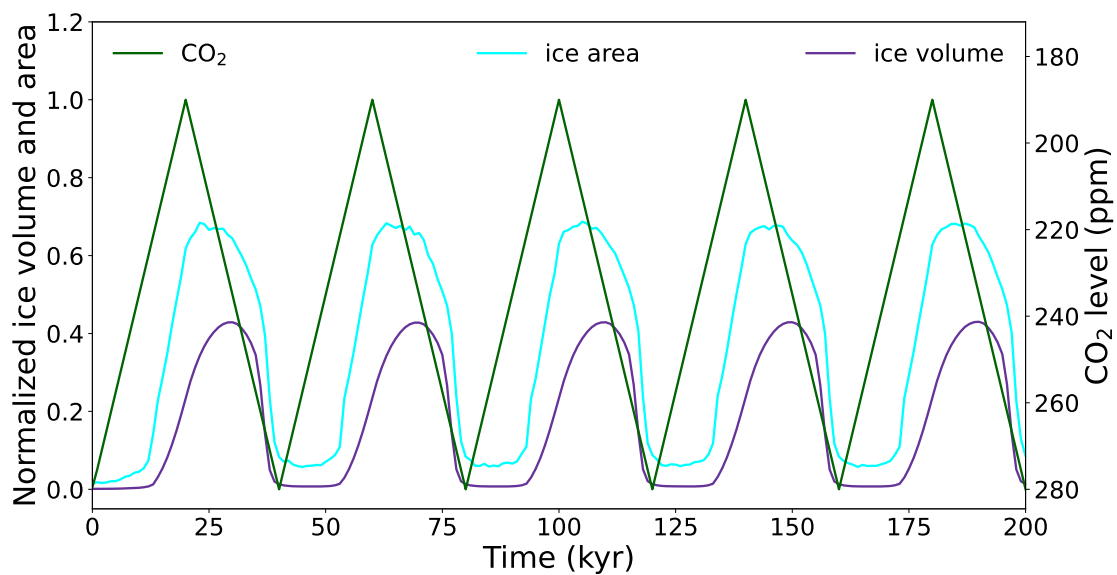

**Figure S4.** Results for the 40-kyr simulation of the North American ice sheet in settings representative for Pleistocene glacial-interglacial variability. Transient evolution over time of ice area (cyan) and ice volume (purple) relative to their maximum sizes as obtained from the 190-ppm equilibrium simulation,  $15.5 \times 10^6 \text{ km}^2$  and 98.9 msle respectively. The green line shows the forcing CO<sub>2</sub> level. The right y-axis is reversed because CO<sub>2</sub> is generally negatively related to the benthic  $\delta^{18}\text{O}$  signal.

## **REFERENCES**

- Berends, C. J., Goelzer, H., Reerink, T. J., Stap, L. B., and van de Wal, R. S. W.:  
Benchmarking the vertically integrated ice-sheet model IMAU-ICE (version 2.0),  
*Geoscientific Model Development*, 15, 5667–5688,  
<https://doi.org/10.5194/gmd-15-5667-2022>, 2022.
- Scherrenberg, M. D. W., Berends, C. J., Stap, L. B., and van de Wal, R. S. W.:  
Modelling feedbacks between the Northern Hemisphere ice sheets and climate  
during the last glacial cycle, *Climate of the Past*, 19, 399–418,  
<https://doi.org/10.5194/cp-19-399-2023>, 2023.
- Stap, L. B., Berends, C. J., Scherrenberg, M. D. W., Van De Wal, R. S. W., and  
Gasson, E. G. W.: Net effect of ice-sheet–atmosphere interactions reduces simulated  
transient Miocene Antarctic ice-sheet variability, *The Cryosphere*, 16, 1315–1332,  
<https://doi.org/10.5194/tc-16-1315-2022>, 2022.
